# Supplementary material
Source: publisher figshare collection journal article supplement (https://acs.figshare.com/ndownloader/files/4461916)
Supplement: Supplementary file 1 [file 4461916]

data_CRYSTALS_cif 
_audit_creation_date        09-12-28
_audit_creation_method CRYSTALS_ver_12.82

_oxford_structure_analysis_title  '?'
_chemical_name_systematic         ?
_chemical_melting_point           ?

_cell_length_a                    6.5963(2)
_cell_length_b                    6.5963(2)
_cell_length_c                    13.9750(3)
_cell_angle_alpha                 90
_cell_angle_beta                  90
_cell_angle_gamma                 90
_cell_volume                      608.07(3)
 
_symmetry_cell_setting            'Tetragonal' 
_symmetry_space_group_name_H-M    'P 41 ' 
_symmetry_space_group_name_Hall   '?' 
loop_
 _symmetry_equiv_pos_as_xyz
 'x,y,z'
 '-y,x,z+1/4'
 '-x,-y,z+1/2'
 'y,-x,z+3/4'

loop_
_atom_type_symbol
_atom_type_scat_dispersion_real
_atom_type_scat_dispersion_imag
_atom_type_scat_Cromer_Mann_a1
_atom_type_scat_Cromer_Mann_b1
_atom_type_scat_Cromer_Mann_a2
_atom_type_scat_Cromer_Mann_b2
_atom_type_scat_Cromer_Mann_a3
_atom_type_scat_Cromer_Mann_b3
_atom_type_scat_Cromer_Mann_a4
_atom_type_scat_Cromer_Mann_b4
_atom_type_scat_Cromer_Mann_c
_atom_type_scat_source  
 C       0.0033   0.0016   2.3100  20.8439   1.0200  10.2075   1.5886   0.5687
   0.8650  51.6512   0.2156 'International Tables Vol C 4.2.6.8 and 6.1.1.4'
 H       0.0000   0.0000   0.4930  10.5109   0.3229  26.1257   0.1402   3.1424
   0.0408  57.7998   0.0030 'International Tables Vol C 4.2.6.8 and 6.1.1.4'
 O       0.0106   0.0060   3.0485  13.2771   2.2868   5.7011   1.5463   0.3239
   0.8670  32.9089   0.2508 'International Tables Vol C 4.2.6.8 and 6.1.1.4'
 F       0.0171   0.0103   3.5392  10.2825   2.6412   4.2944   1.5170   0.2615
   1.0243  26.1476   0.2776 'International Tables Vol C 4.2.6.8 and 6.1.1.4'
 N       0.0061   0.0033  12.2126   0.0057   3.1322   9.8933   2.0125  28.9975
   1.1663   0.5826 -11.5290 'International Tables Vol C 4.2.6.8 and 6.1.1.4'
 
 
_cell_formula_units_Z                    4

# Given Formula = C6 H8 F1 N1 O2 
# Dc =      1.59 Fooo =    304.00 Mu =      1.38 M =    145.13
# Found Formula = C6 H8 F1 N1 O2 
# Dc =      1.59 FOOO =    304.00 Mu =      1.38 M =    145.13

_chemical_formula_sum             'C6 H8 F1 N1 O2'
_chemical_formula_moiety          'C6 H8 F1 N1 O2'
_chemical_compound_source                ?
_chemical_formula_weight            145.13
 
 
_cell_measurement_reflns_used          740
_cell_measurement_theta_min              0
_cell_measurement_theta_max             27
_cell_measurement_temperature          150
 
_exptl_crystal_description        'rod' 
_exptl_crystal_colour             'colourless' 
_exptl_crystal_size_min           0.25 
_exptl_crystal_size_mid           0.30 
_exptl_crystal_size_max           0.30 
 
_exptl_crystal_density_diffrn     1.585 
_exptl_crystal_density_meas       ? 
# Non-dispersive F(000): 
_exptl_crystal_F_000              304 
_exptl_absorpt_coefficient_mu     0.138 
 
# Sheldrick geometric approximatio 0.96 0.97 
_exptl_absorpt_correction_type    gaussian 
_exptl_absorpt_process_details 
; 
 Gaussian Integration (Busing and Levy, 1957) 
; 
_exptl_absorpt_correction_T_min   0.96 
_exptl_absorpt_correction_T_max   0.97 
_diffrn_measurement_device_type   'Nonius Kappa CCD' 
_diffrn_radiation_monochromator   'graphite' 
_diffrn_radiation_type            'Mo K\a'
_diffrn_radiation_wavelength           0.71073
_diffrn_measurement_method        '\f & \w scans' 
 
_computing_data_collection        'COLLECT. Nonius (1997-2001).' 
_computing_data_reduction         'DENZO/SCALEPACK (Otwinowski & Minor, 1997)' 
_computing_cell_refinement        'DENZO/SCALEPACK (Otwinowski & Minor, 1997)' 
_computing_structure_solution     'SIR92 (Altomare et al., 1994)' 
_computing_structure_refinement   'CRYSTALS (Betteridge et al., 2003)' 
_computing_publication_material   'CRYSTALS (Betteridge et al., 2003)' 
_computing_molecular_graphics     'CAMERON (Watkin et al., 1996)' 
 
_diffrn_standards_interval_time   ? 
_diffrn_standards_interval_count  ? 
_diffrn_standards_number          0 
_diffrn_standards_decay_%         ? 
 
_diffrn_ambient_temperature        150
_diffrn_reflns_number             1396 
_reflns_number_total              727 
_diffrn_reflns_av_R_equivalents   0.008 
# Number of reflections with Friedels Law is 727 
# Number of reflections without Friedels Law is 0 
# Theoretical number of reflections is about 695 
 
 
_diffrn_reflns_theta_min          3.088 
_diffrn_reflns_theta_max          27.451 
_diffrn_measured_fraction_theta_max 1.000 
 
_diffrn_reflns_theta_full         27.451 
_diffrn_measured_fraction_theta_full 1.000 
 
 
_diffrn_reflns_limit_h_min        -8 
_diffrn_reflns_limit_h_max        8 
_diffrn_reflns_limit_k_min        -6 
_diffrn_reflns_limit_k_max        6 
_diffrn_reflns_limit_l_min        -18 
_diffrn_reflns_limit_l_max        18 
_reflns_limit_h_min               -5 
_reflns_limit_h_max               6 
_reflns_limit_k_min               0 
_reflns_limit_k_max               8 
_reflns_limit_l_min               0 
_reflns_limit_l_max               18 
 
_oxford_diffrn_Wilson_B_factor    0.00 
_oxford_diffrn_Wilson_scale       0.00 
 
_atom_sites_solution_primary      direct #heavy,direct,difmap,geom
# _atom_sites_solution_secondary  difmap
_atom_sites_solution_hydrogens    geom
 
_refine_diff_density_min          -0.24 
_refine_diff_density_max          0.14 
 
 
_refine_ls_number_reflns          672 
_refine_ls_number_restraints      1 
_refine_ls_number_parameters      123 
 
#_refine_ls_R_factor_ref 0.0249 
_refine_ls_wR_factor_ref          0.0257 
_refine_ls_goodness_of_fit_ref    0.9295 
 
#_reflns_number_all 725 
_refine_ls_R_factor_all           0.0276 
_refine_ls_wR_factor_all          0.0281 
 
# The I/u(I) cutoff below was used for refinement as 
# well as the _gt R-factors:
_reflns_threshold_expression      I>1.96u(I)
_reflns_number_gt                 672 
_refine_ls_R_factor_gt            0.0249 
_refine_ls_wR_factor_gt           0.0257 
 
_refine_ls_shift/su_max           0.000140 
 
# choose from: rm (reference molecule of known chirality), 
# ad (anomolous dispersion - Flack), rmad (rm and ad), 
# syn (from synthesis), unk (unknown) or . (not applicable). 
_chemical_absolute_configuration  'unk' 
 
 
_refine_ls_structure_factor_coef  F 
_refine_ls_matrix_type            full
_refine_ls_hydrogen_treatment     mixed          # none, undef, noref, refall,
                                                 # refxyz, refU, constr or mixed
_refine_ls_weighting_scheme       calc 
_refine_ls_weighting_details 
;
 Method, part 1, Chebychev polynomial, (Watkin, 1994, Prince, 1982) 
 [weight] = 1.0/[A~0~*T~0~(x)+A~1~*T~1~(x) ... +A~n-1~]*T~n-1~(x)] 
 where A~i~ are the Chebychev coefficients listed below and x= Fcalc/Fmax 
 Method = Robust Weighting (Prince, 1982) 
 W = [weight] * [1-(deltaF/6*sigmaF)^2^]^2^ 
 A~i~ are: 
 0.287 0.125 0.488E-01 
;
 
 
 
# Check this file using the IUCr facility at: 
# http://checkcif.iucr.org/ 
 
# The content below is held in the file 'script/refcif.dat'. This is a text 
# file which you may edit to reflect local conditions. 
# Items which need looking at are represented by a '?'. 
# Items for which there are choices are prefixed with 'choose from'. 
 
_publ_contact_letter 
; 
 Please consider this CIF submission for 
 publication as a Short Format Paper in Acta 
 Crystallographica E. The figures have been 
 sent by mail. 
; 
_publ_contact_author_name         'Anthony Other' 
_publ_contact_author_address 
; 
 Chemical Crystallography Laboratory, 
 Department of Chemistry, 
 University of Nowhere, 
 Nowhere, NO1 4T, UK. 
; 
 
_publ_contact_author_phone        '+44 1865 000000' 
_publ_contact_author_fax          '+44 1865 000000' 
_publ_contact_author_email        'a.n.other@chem.no.ac.uk' 
_publ_requested_journal           'Section C' 
_publ_requested_category          CO # choose from: FI FM FO CI CM CO AD 
_publ_requested_coeditor_name     'Prof William Clegg' 
 
_publ_section_title               # Title of paper 
; ? 
; 
 
# The loop structure below should contain the names and addresses of all 
# authors, in the required order of publication. Repeat as necessary. 
loop_ 
 _publ_author_name 
 _publ_author_address 
 _publ_author_footnote 
 'Other, Anthony N.' # Author 1 
; 
 ? # Address for author 1 
; 
; 
 ? # Footnote for author 1 
; 
 'Else, S. O.' # Author 2 
; 
 ? # Address 2 
; 
; 
 ? # Footnote 2 
; 
 
 
_publ_section_abstract            # Text of the abstract 
; ? 
; 
_publ_section_comment             # Text of the paper 
; ? 
; 
_publ_section_acknowledgements    # Acknowledgments 
; ? 
; 
_publ_section_figure_captions     # Captions to figures 
; ? 
; 
 
_publ_section_exptl_refinement    # Some potentially useful phrases are: 
; 
Because the data were collected with molybdenum radiation, there were no 
measurable anomalous differences, as a consequence of which it was 
admissible to merge Friedel pairs of reflections. 
 
All hydrogen atoms were found in difference density syntheses. 
 
Hydrogen atoms were placed geometrically after each cycle. 
 
Hydrogen atoms were placed geometrically after each cycle, the preferred 
orientations of those groups whose conformations could not be assigned 
unambiguously having been previously identified by examination of a 
difference Fourier map. 
 
Hydrogen atoms were seen in a difference density synthesis. Those 
attached to carbon atoms were repositioned geometrically. 
 
Hydrogen were initially refined with soft restraints on the 
bonds to regularise their geometry (bond lengths to accepted values, 
angles either set by symmetry or to accepted values, and 
U[iso] dependent upon the adjacent bonded atom), 
after which they were refined with riding constraints only. 
 
 
donated by Bill Clegg: 
 
The H atoms were all located in a difference map, but those 
attached to carbon atoms were repositioned geometrically. 
The H atoms were initially refined with soft restraints on the 
bond lengths and angles to regularise their geometry (C---H in the range 
0.93-98, O---N in the range 0.86-0.89 and O---H = 0.82 \%A) and isotropic adps 
(U(H) in the range 1.2-1.5 times U~equiv~ of the adjacent atom), 
after which they were refined with riding constraints. 
. 
; 
 
_publ_section_exptl_prep 
; ? 
; 
 
 
# PROCESSING SUMMARY (IUCr Office Use Only): 
_journal_date_recd_electronic     ? 
_journal_date_to_coeditor         ? 
_journal_date_from_coeditor       ? 
_journal_date_accepted            ? 
_journal_date_printers_first      ? 
_journal_date_printers_final      ? 
_journal_date_proofs_out          ? 
_journal_date_proofs_in           ? 
_journal_coeditor_name            ? 
_journal_coeditor_code            ? 
_journal_coeditor_notes           ? 
_journal_techeditor_code          ? 
_journal_techeditor_notes         ? 
_journal_coden_ASTM               ? 
_journal_name_full                ? 
_journal_year                     ? 
_journal_volume                   ? 
_journal_issue                    ? 
_journal_page_first               ? 
_journal_page_last                ? 
_journal_suppl_publ_number        ? 
_journal_suppl_publ_pages         ? 
 
# End of 'script/refcif.dat' 
 
 
 
# Insert your own references if required - in alphabetical order 
_publ_section_references 
; 
Altomare, A., Cascarano, G., Giacovazzo G., Guagliardi A., Burla M.C., 
Polidori, G. & Camalli, M. (1994). J. Appl. Cryst. (27), 435-435 
 
Betteridge, P.W., Carruthers, J.R., Cooper, R.I., 
Prout, K., & Watkin, D.J. (2003). J. Appl. Cryst. 36, 1487. 
 
Busing, W.R. & Levy, H.A., (1975). Acta Cryst 10, 180 
 
Nonius (1997-2001). COLLECT. Nonius BV, Delft, The Netherlands. 
 
Otwinowski, Z. & Minor, W. (1997). Methods in Enzymology, Vol. 276, 
edited by C. W. Carter Jr & R. M. Sweet, pp. 307--326. 
New York: Academic Press. 
 
Prince, E. 
Mathematical Techniques in Crystallography 
and Materials Science 
Springer-Verlag, New York, 1982. 
 
Watkin D.J. (1994). 
Acta Cryst, A50, 411-437 
 
Watkin, D.J., Prout, C.K. & Pearce, L.J. (1996). CAMERON, Chemical 
Crystallography Laboratory, OXFORD, UK. 
; 

# Uequiv = arithmetic mean of Ui i.e. Ueqiv = (U1+U2+U3)/3

# Replace last . with number of unfound hydrogen atomsattached to an atom.

# ..._refinement_flags_... 
# . no refinement constraints           S special position constraint on site
# G rigid group refinement of site      R riding atom
# D distance or angle restraint on site T thermal displacement constraints
# U Uiso or Uij restraint (rigid bond)  P partial occupancy constraint


loop_
_atom_site_label
_atom_site_type_symbol
_atom_site_fract_x
_atom_site_fract_y
_atom_site_fract_z
_atom_site_U_iso_or_equiv
_atom_site_occupancy
_atom_site_adp_type
_atom_site_refinement_flags_posn
_atom_site_refinement_flags_adp
_atom_site_refinement_flags_occupancy
_atom_site_disorder_assembly
_atom_site_disorder_group
_atom_site_attached_hydrogens
F1 F 0.90242(15) -0.00218(17) 0.51606(11) 0.0265 1.0000 Uani . . . . . . 
O1 O 0.4739(2) -0.0076(2) 0.67657(12) 0.0240 1.0000 Uani . . . . . . 
O2 O 0.36777(19) 0.2369(2) 0.57596(11) 0.0247 1.0000 Uani . . . . . . 
N1 N 0.4842(3) -0.0298(3) 0.43640(13) 0.0233 1.0000 Uani . . . . . . 
C1 C 0.3337(3) 0.0319(3) 0.60120(14) 0.0230 1.0000 Uani . . . . . . 
C2 C 0.3720(3) -0.1138(3) 0.51837(16) 0.0236 1.0000 Uani . . . . . . 
C3 C 0.5859(3) -0.1753(3) 0.50133(15) 0.0215 1.0000 Uani . . . . . . 
C4 C 0.7409(3) -0.0898(3) 0.56839(14) 0.0201 1.0000 Uani . . . . . . 
C5 C 0.6568(3) 0.0732(3) 0.63539(15) 0.0195 1.0000 Uani . . . . . . 
C6 C 0.5834(3) 0.2676(3) 0.58751(15) 0.0230 1.0000 Uani . . . . . . 
H11 H 0.202(4) 0.015(3) 0.6258(17) 0.023(6) 1.0000 Uiso . . . . . . 
H21 H 0.265(4) -0.214(4) 0.5064(18) 0.034(7) 1.0000 Uiso . . . . . . 
H31 H 0.612(3) -0.310(4) 0.477(2) 0.027(6) 1.0000 Uiso . . . . . . 
H41 H 0.794(4) -0.202(4) 0.6102(18) 0.028(6) 1.0000 Uiso . . . . . . 
H51 H 0.753(3) 0.107(3) 0.6864(16) 0.019(5) 1.0000 Uiso . . . . . . 
H61 H 0.612(4) 0.377(4) 0.635(2) 0.035(6) 1.0000 Uiso . . . . . . 
H62 H 0.651(4) 0.288(3) 0.5237(18) 0.027(6) 1.0000 Uiso . . . . . . 
H1 H 0.440(4) -0.097(4) 0.386(2) 0.037(7) 1.0000 Uiso . . . . . . 
loop_
_atom_site_aniso_label
_atom_site_aniso_U_11
_atom_site_aniso_U_22
_atom_site_aniso_U_33
_atom_site_aniso_U_23
_atom_site_aniso_U_13
_atom_site_aniso_U_12
F1 0.0171(5) 0.0326(5) 0.0298(6) 0.0000(5) 0.0044(4) -0.0023(4) 
O1 0.0216(6) 0.0329(7) 0.0176(5) 0.0029(5) 0.0019(5) -0.0016(5) 
O2 0.0220(6) 0.0271(7) 0.0249(7) -0.0035(5) -0.0019(5) 0.0061(5) 
N1 0.0241(8) 0.0296(8) 0.0164(8) -0.0028(6) -0.0025(6) 0.0022(6) 
C1 0.0171(8) 0.0302(9) 0.0217(9) -0.0018(8) 0.0006(7) 0.0000(7) 
C2 0.0204(8) 0.0252(9) 0.0252(9) -0.0029(8) -0.0019(7) -0.0037(7) 
C3 0.0204(8) 0.0194(8) 0.0248(9) -0.0030(7) -0.0002(7) 0.0007(6) 
C4 0.0165(8) 0.0216(8) 0.0222(8) 0.0019(7) 0.0007(6) 0.0003(6) 
C5 0.0160(8) 0.0247(8) 0.0180(7) -0.0002(7) -0.0002(7) -0.0020(7) 
C6 0.0220(9) 0.0215(9) 0.0254(9) -0.0019(8) -0.0012(7) -0.0005(7) 

_refine_ls_extinction_method 
    'None'
_oxford_refine_ls_scale 0.8493(18) 
loop_
 _geom_bond_atom_site_label_1
 _geom_bond_site_symmetry_1
 _geom_bond_atom_site_label_2
 _geom_bond_site_symmetry_2
 _geom_bond_distance
 _geom_bond_publ_flag
F1 . C4 . 1.416(2)    yes
O1 . C1 . 1.425(2)    yes
O1 . C5 . 1.439(2)    yes
O2 . C1 . 1.415(2)    yes
O2 . C6 . 1.446(2)    yes
N1 . C2 . 1.472(2)    yes
N1 . C3 . 1.482(2)    yes
N1 . H1 . 0.88(3)    no
C1 . C2 . 1.526(3)    yes
C1 . H11 . 0.94(2)    no
C2 . C3 . 1.487(2)    yes
C2 . H21 . 0.98(2)    no
C3 . C4 . 1.498(2)    yes
C3 . H31 . 0.96(2)    no
C4 . C5 . 1.530(3)    yes
C4 . H41 . 1.00(2)    no
C5 . C6 . 1.525(2)    yes
C5 . H51 . 0.98(2)    no
C6 . H61 . 1.00(3)    no
C6 . H62 . 1.01(3)    no
loop_
 _geom_angle_atom_site_label_1
 _geom_angle_site_symmetry_1
 _geom_angle_atom_site_label_2
 _geom_angle_site_symmetry_2
 _geom_angle_atom_site_label_3
 _geom_angle_site_symmetry_3
 _geom_angle
 _geom_angle_publ_flag
C1 . O1 . C5 . 100.40(14)    yes
C1 . O2 . C6 . 105.19(12)    yes
C2 . N1 . C3 . 60.47(12)    yes
C2 . N1 . H1 . 105.3(18)    no
C3 . N1 . H1 . 108.2(17)    no
O1 . C1 . O2 . 104.83(14)    yes
O1 . C1 . C2 . 109.77(15)    yes
O2 . C1 . C2 . 112.75(15)    yes
O1 . C1 . H11 . 107.8(14)    no
O2 . C1 . H11 . 110.7(14)    no
C2 . C1 . H11 . 110.7(13)    no
C1 . C2 . N1 . 115.87(15)    yes
C1 . C2 . C3 . 116.76(15)    yes
N1 . C2 . C3 . 60.07(12)    yes
C1 . C2 . H21 . 115.7(15)    no
N1 . C2 . H21 . 118.8(15)    no
C3 . C2 . H21 . 118.2(14)    no
C2 . C3 . N1 . 59.46(12)    yes
C2 . C3 . C4 . 116.42(16)    yes
N1 . C3 . C4 . 116.65(15)    yes
C2 . C3 . H31 . 118.5(14)    no
N1 . C3 . H31 . 117.6(16)    no
C4 . C3 . H31 . 116.2(14)    no
C3 . C4 . F1 . 110.15(15)    yes
C3 . C4 . C5 . 113.58(14)    yes
F1 . C4 . C5 . 107.59(14)    yes
C3 . C4 . H41 . 108.9(14)    no
F1 . C4 . H41 . 109.9(14)    no
C5 . C4 . H41 . 106.6(14)    no
C4 . C5 . O1 . 106.76(14)    yes
C4 . C5 . C6 . 115.95(16)    yes
O1 . C5 . C6 . 102.75(14)    yes
C4 . C5 . H51 . 111.7(12)    no
O1 . C5 . H51 . 109.5(13)    no
C6 . C5 . H51 . 109.6(12)    no
C5 . C6 . O2 . 104.09(14)    yes
C5 . C6 . H61 . 104.9(15)    no
O2 . C6 . H61 . 111.2(15)    no
C5 . C6 . H62 . 111.4(13)    no
O2 . C6 . H62 . 110.7(13)    no
H61 . C6 . H62 . 114.0(19)    no
